# Supplementary material
Source: MDPI journal article supplement (https://www.mdpi.com/2076-3263/6/3/39)
Supplement: s1 [file s1]

Archive with 3 entries (3 files):
- NinomiyaIndexColorQCM-NorthEverestTile(N29E86-N28E87)L3g3tif.kmz
- geosciences-132819-supplementary.pdf
- NinomiyaIndexColorQCM-CentralTibetanPlateau(N37E84-N28E90)L3(+L1)g9jpg6ps.kmz
