# Supplementary material
Source: MDPI journal article supplement (https://www.mdpi.com/2076-3263/6/3/39)
Supplement: s1 [file s1 › geosciences-132819-supplementary.pdf]

# Supplementary Materials: Regional Lithological Mapping Using ASTER-TIR Data: Case Study for the Tibetan Plateau and the Surrounding Area

Yoshiki Ninomiya and Bihong Fu

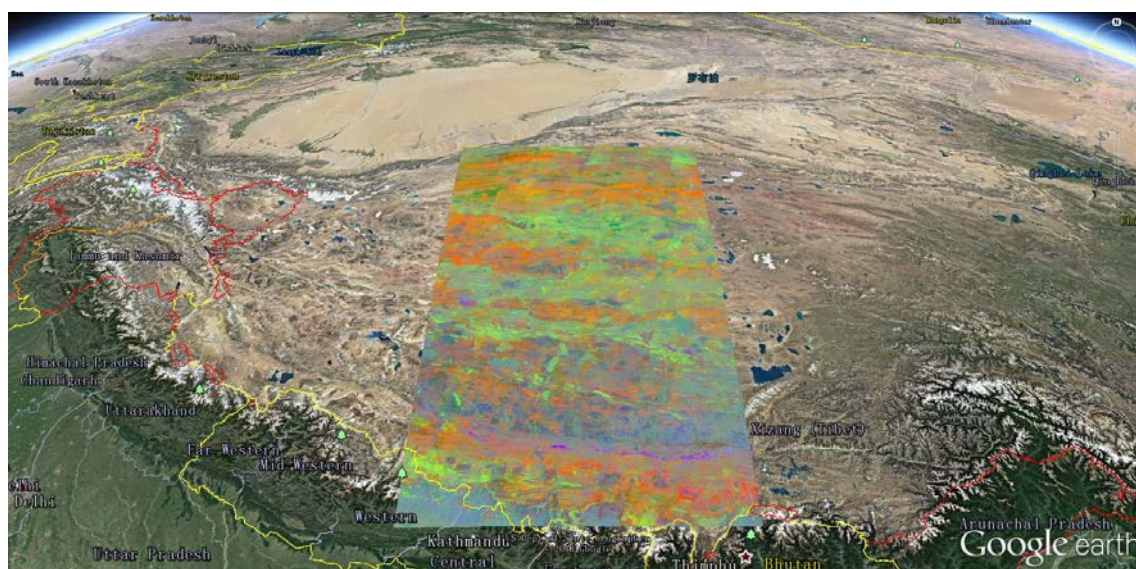

**Figure S1.** Mosaic color composite image of QI, CI and MI with a linear contrast stretch of 0.97–1.055 (QI; Red), 1.005–1.055 (CI; Green) and 0.79–0.95 (MI; Blue), produced with ASTER Level-3A products covering the entire study area. The pixel is re-sampled every 9 s, and the image is compressed with jpeg format. This file is converted from Figure 4 without annotations.

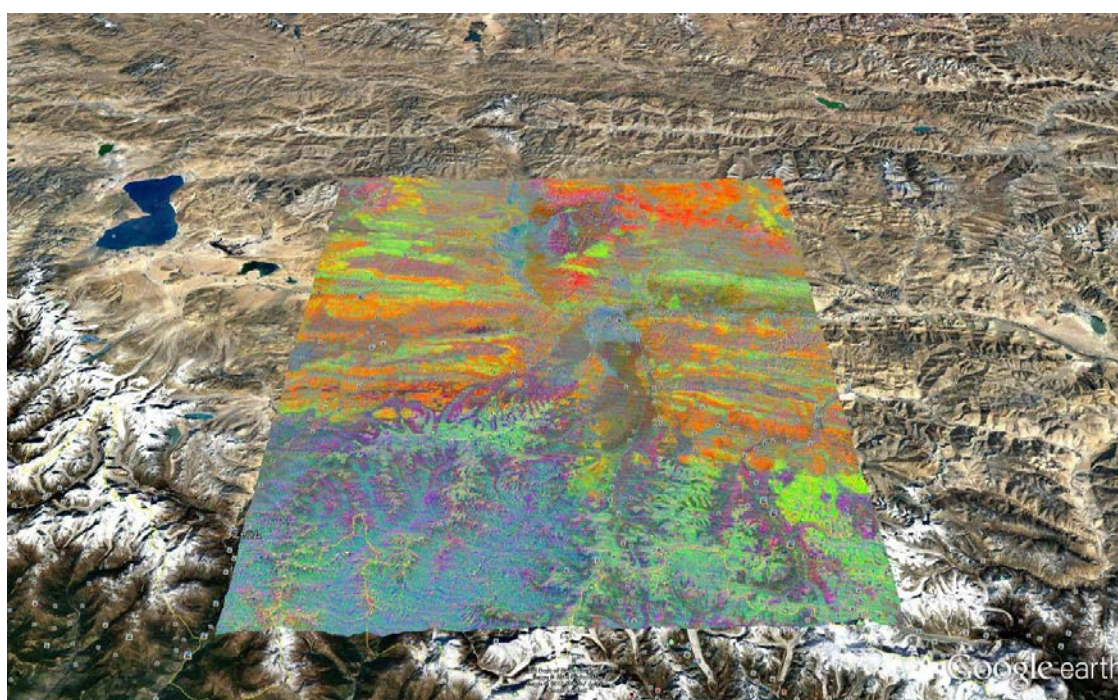

**Figure S2.** Mosaic color composite image of QI, CI and MI with a linear contrast stretch of 0.97–1.055 (QI; Red), 1.005–1.055 (CI; Green) and 0.79–0.95 (MI; Blue), produced with ASTER Level-3A products covering the north western part of Mt. Everest bounded by latitude 28° N to 29° N and longitude 86° E to 87° E. The pixel is re-sampled every 3 s, and the image is not compressed. This file is converted from Figure 7c.
